# Supplementary material for: SERRS multiplexing with multivalent nanostructures for the identification and enumeration of epithelial and mesenchymal cells
Source: PubMed Central journal article supplement (PMC7519640; doi:10.1038/s41598-020-72911-w), 2020-09-25
Supplement: 41598_2020_72911_MOESM1_ESM.pdf [file 41598_2020_72911_MOESM1_ESM.pdf]

# Supporting Information

## SERRS Multiplexing with Multivalent Nanostructures for the Identification and Enumeration of Epithelial and Mesenchymal Cells

*Lucio Litti, Andrea Colusso, Marcella Pinto, Erlis Ruli, Alessia Scarsi, Laura Ventura, Giuseppe Toffoli, Marco Colombatti, Giulio Fracasso,\* Moreno Meneghetti\**

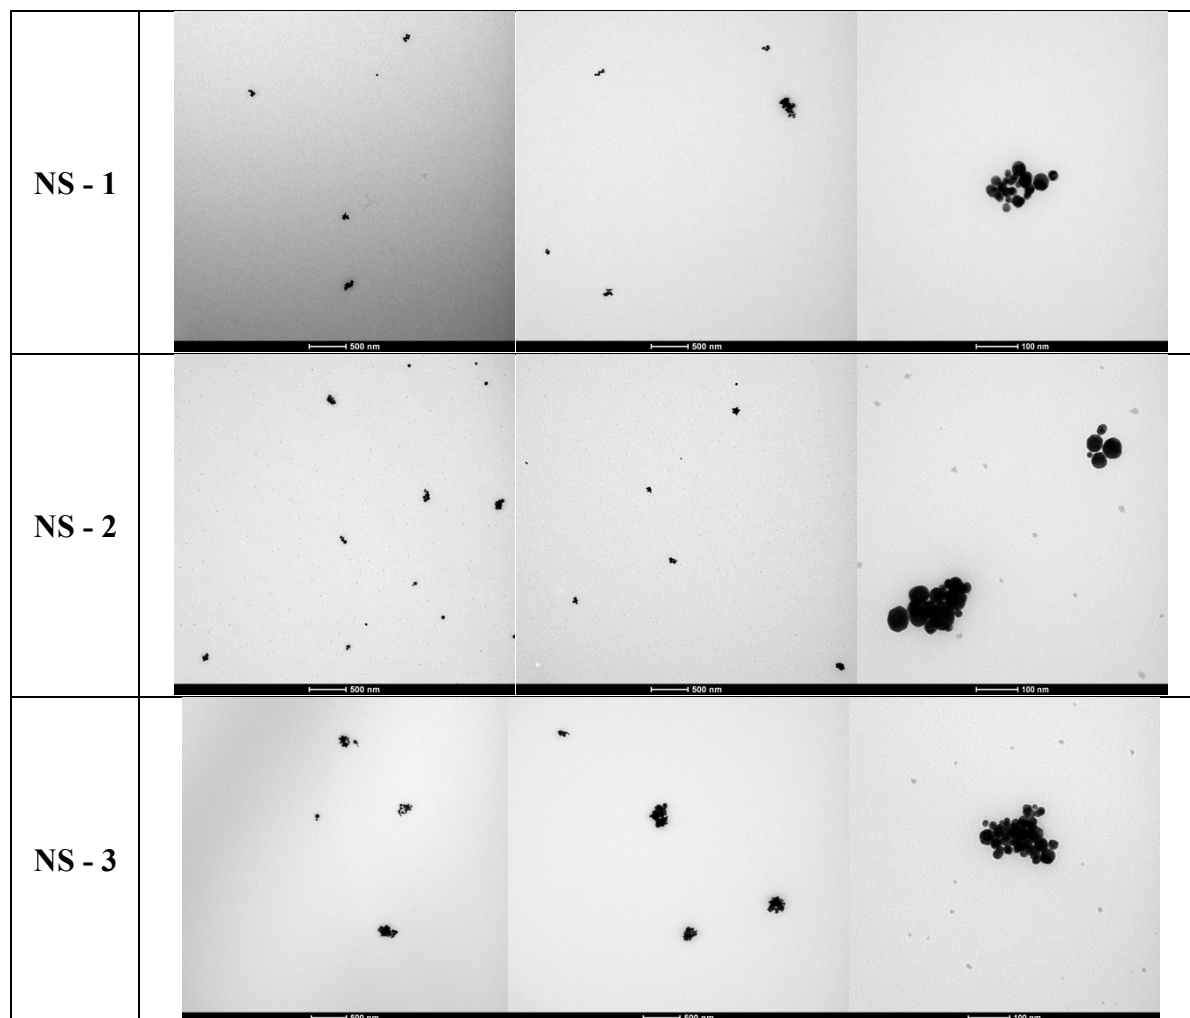

Figure S 1: TEM images for the three nanostructures NS-1, NS-2 and NS-3. In the first and second columns the bar below the images corresponds to 500 nm, whereas in the third it corresponds to 100 nm. We found average dimensions within 100 - 200 nm for all the nanostructures.

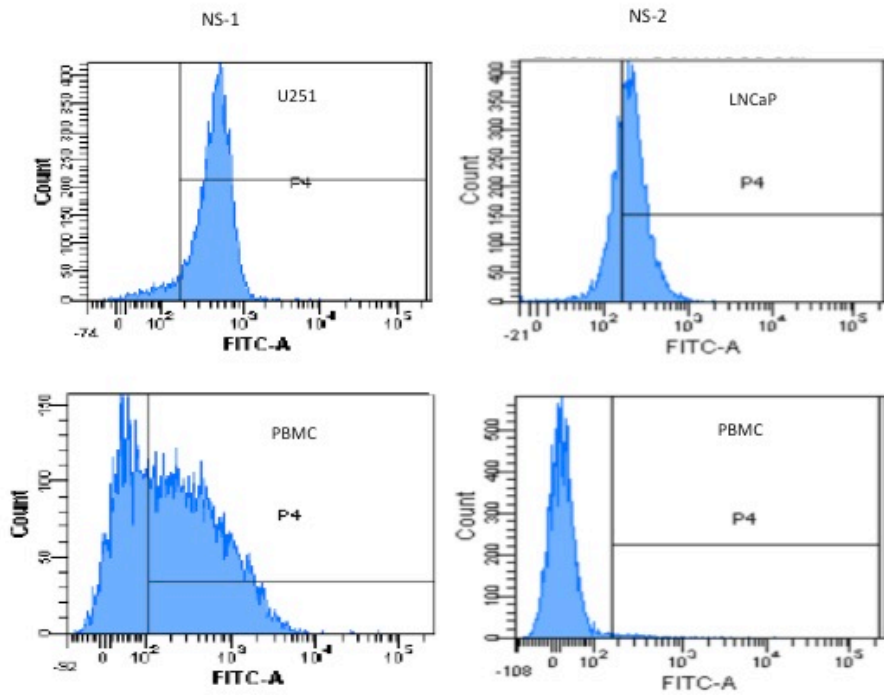

Figure S 2: Activity of NS-1 and NS-2 for U251, LNCaP respectively and of both for PBMC with a FACS analysis. The data give only a qualitative indication of the activity because of the fluorescence quenching activity of the plasmonic nanostructures.

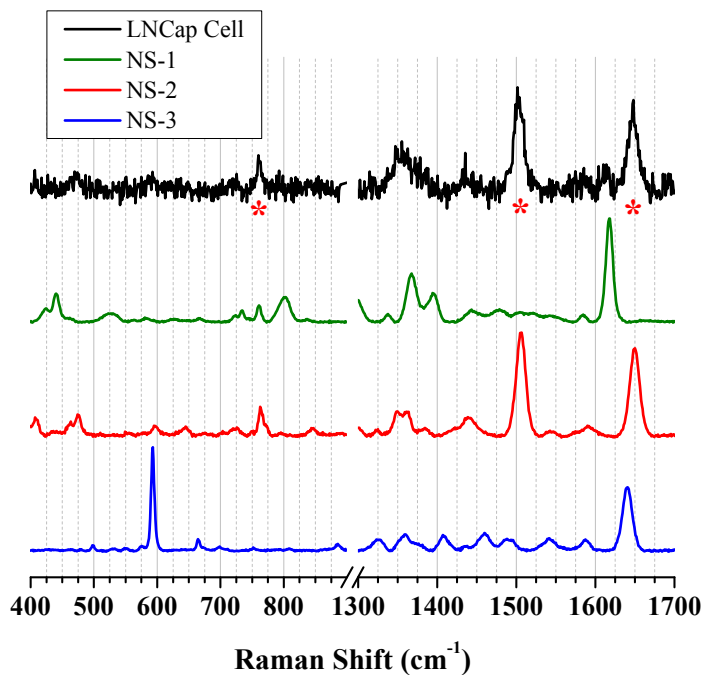

Figure S 3: SERRS spectra of an LNCaP cell after incubation with all three types of nanostructures and washing. Below are the reference SERRS spectra of NS-1, 2 and 3. In the cell spectrum asterisks indicate the relevant features of NS-2.

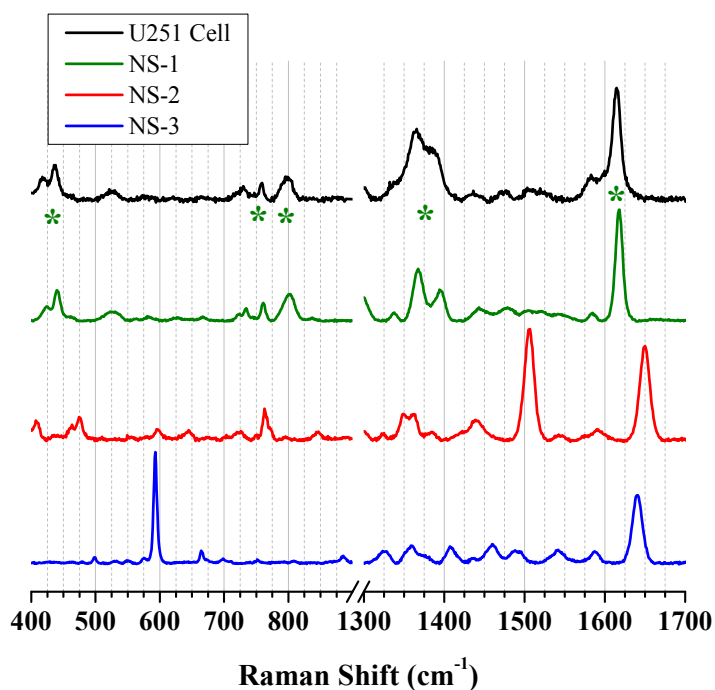

Figure S 4: SERRS spectra of a U251 cell after incubation with all three types of nanostructures and washing. Below are the reference SERRS spectra of NS-1, 2 and 3. In the cell spectrum asterisks indicate the relevant features of NS-1.

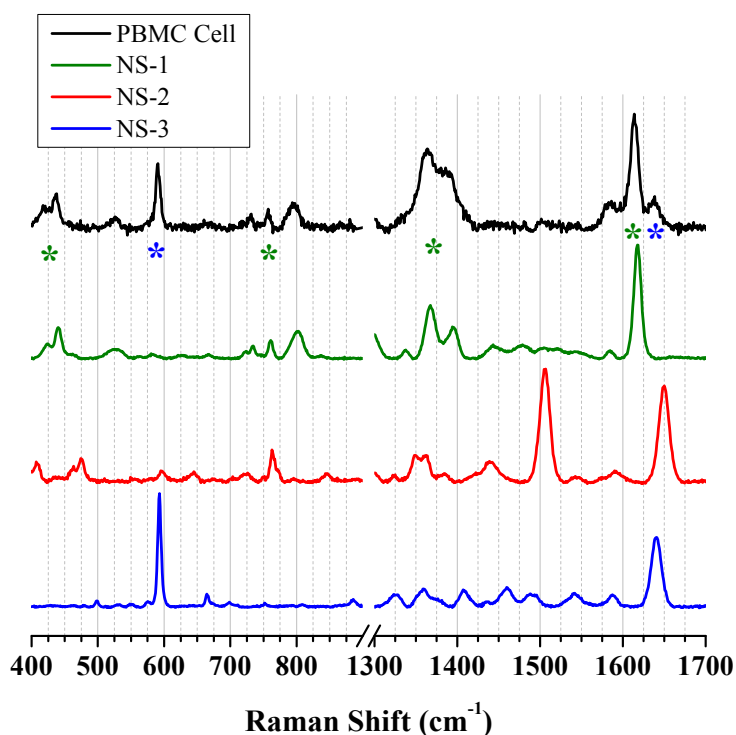

Figure S5 SERRS spectra of a PBMC after incubation with all three types of nanostructures and washing. Below are the reference SERRS spectra of NS-1, 2 and 3. In the cell spectrum asterisks indicate the relevant features of NS-1 and NS-3.

|       | Classified as LNCaP | Classified as PBMC | Classified as U251 | classification error |
|-------|---------------------|--------------------|--------------------|----------------------|
| LNCap | 142                 | 6                  | 4                  | 6.6 %                |
| PBMCs | 34                  | 798                | 66                 | 11.1 %               |
| U251  | 13                  | 19                 | 127                | 20.1 %               |

Table S 1: RF confusion matrix

Table S1 gives the estimated classification error rate for each kind of cell contained into the theoretical mixing, while the entire model has a percentage error of less than 12%.

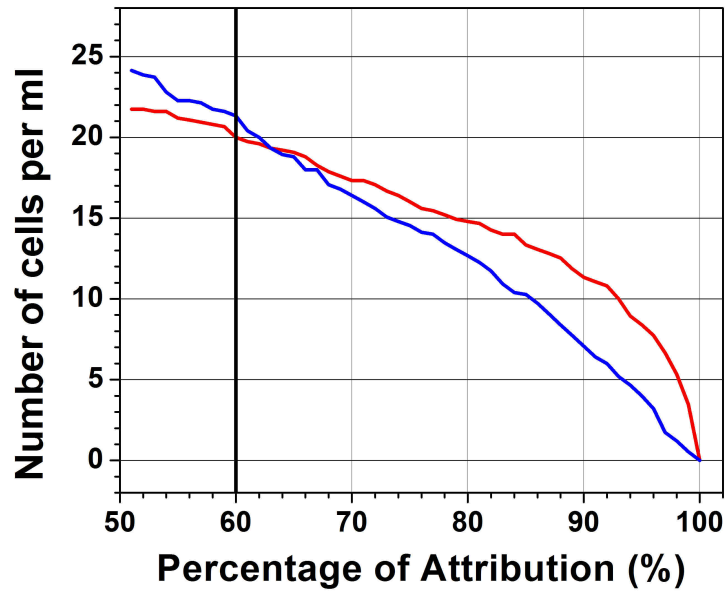

Figure S6. Amount of cells found against percentage of attribution. Increasing the percentage of attribution the correct identification of a cell is increased, but lower number of cells are identified. 60% percentage attribution can be considered the best value for the identification.
